# Supplementary material for: Design, Synthesis, and Biological Evaluation of Artemisinin-Indoloquinoline Hybrids as Potent Antiproliferative Agents
Source: PubMed Central journal article supplement (PMC6271626; doi:10.3390/molecules191119021), 2014-11-18

# Supplementary

Figure S1.  $^1\text{H-NMR}$  spectra of 7a.

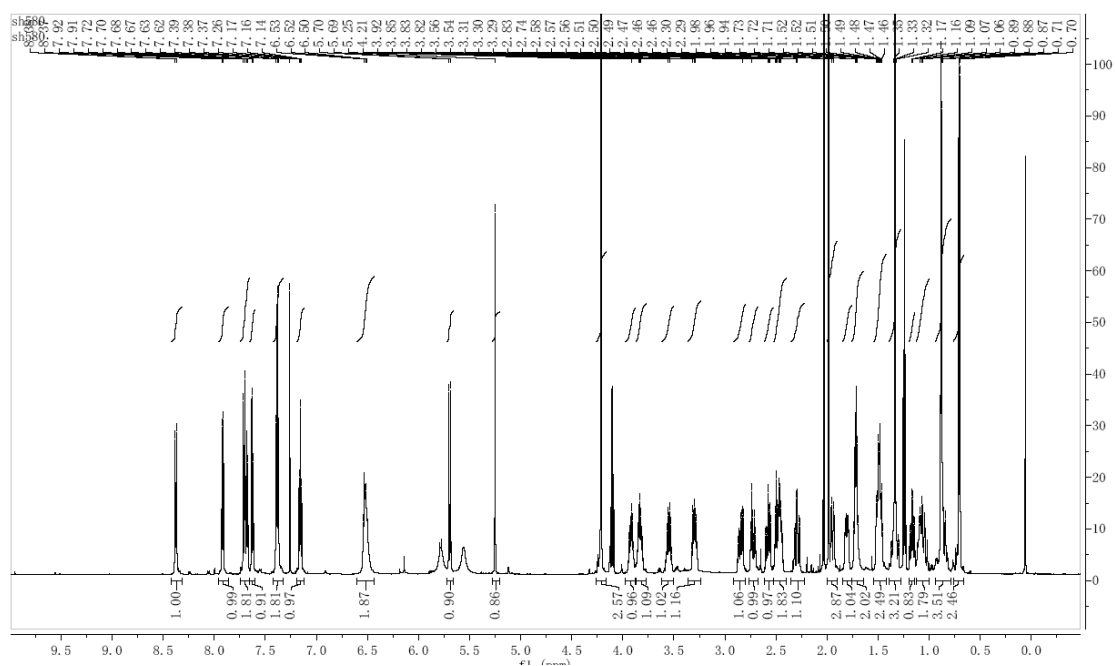

Figure S2.  $^{13}\text{C-NMR}$  spectra of 7a.

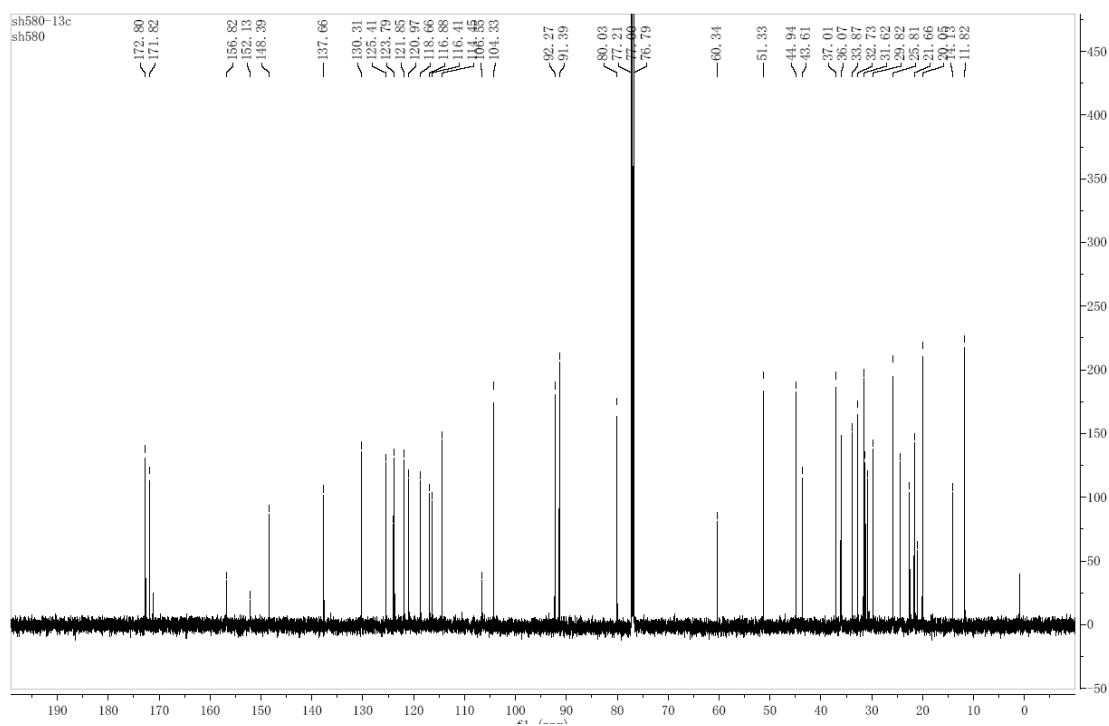

Figure S3. HRMS of 7a.

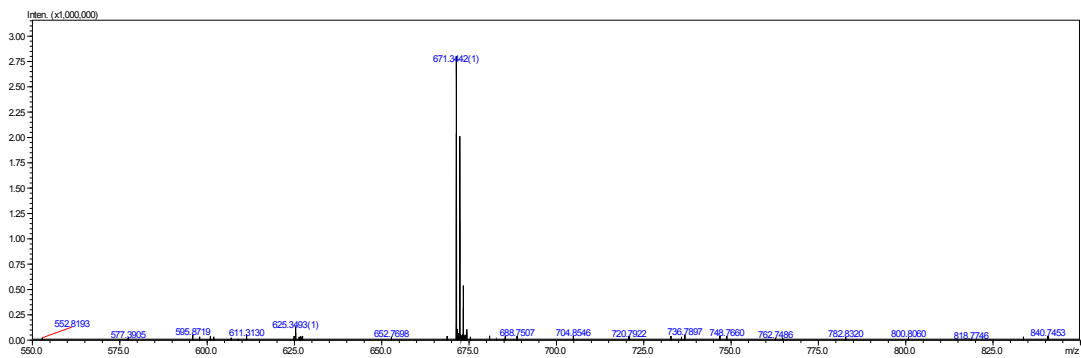Figure S4.  $^1\text{H-NMR}$  spectra of 7b.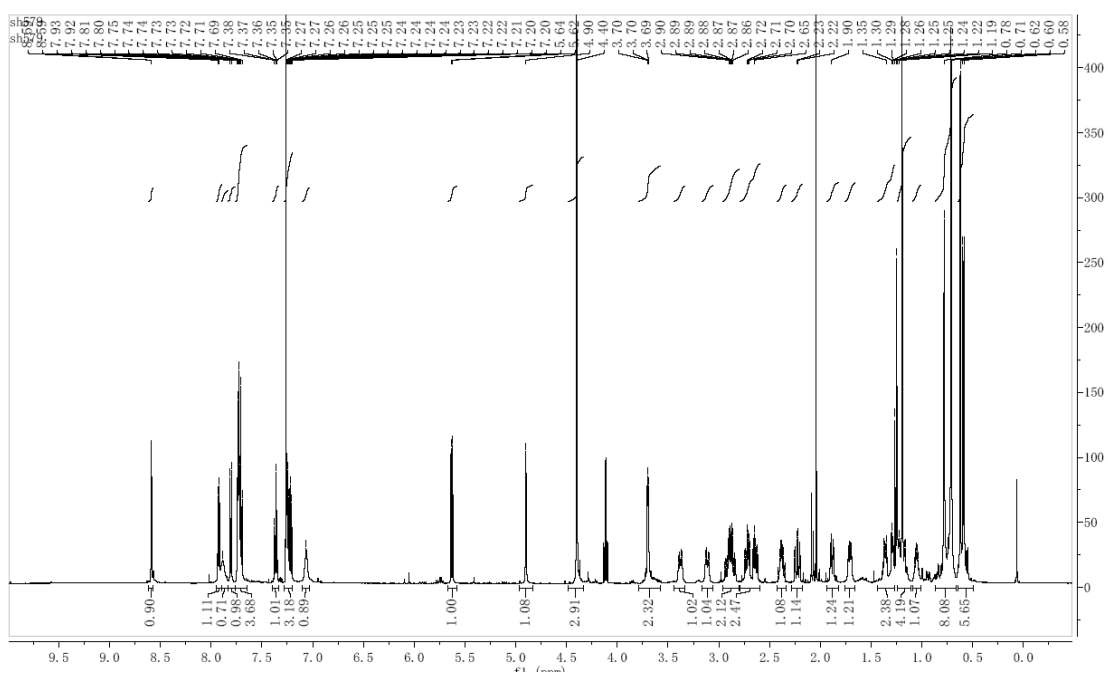

Figure S5.  $^{13}\text{C}$ -NMR spectra of 7b.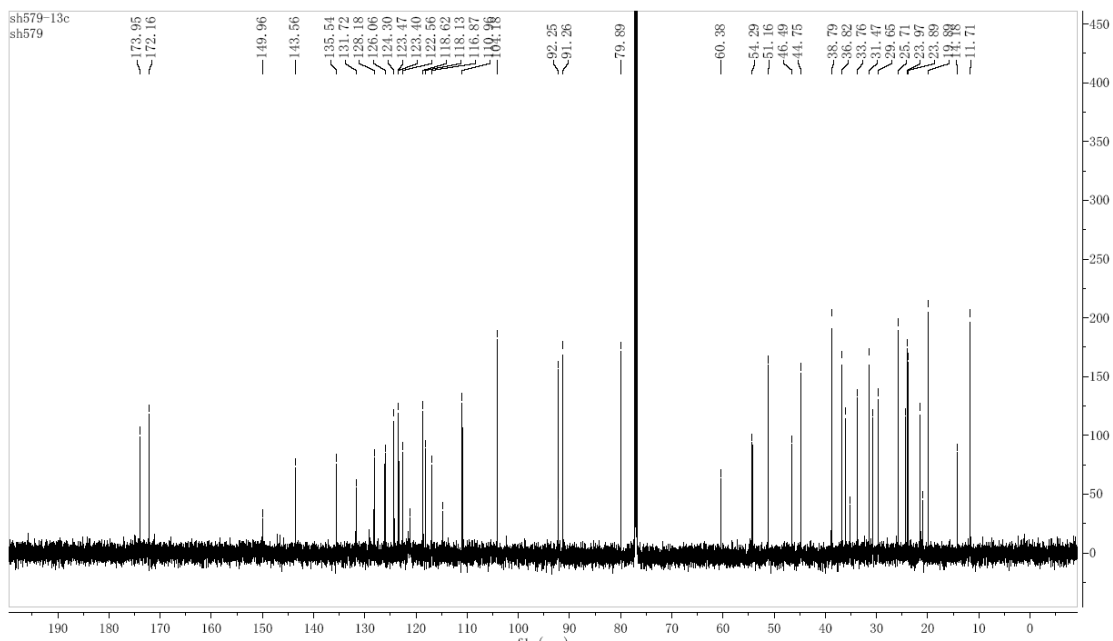

Figure S6. HRMS of 7b.

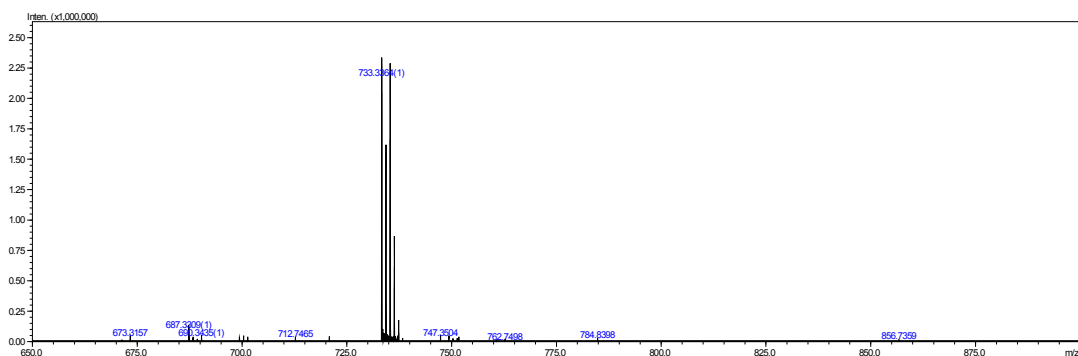Figure S7.  $^1\text{H}$ -NMR spectra of 7c.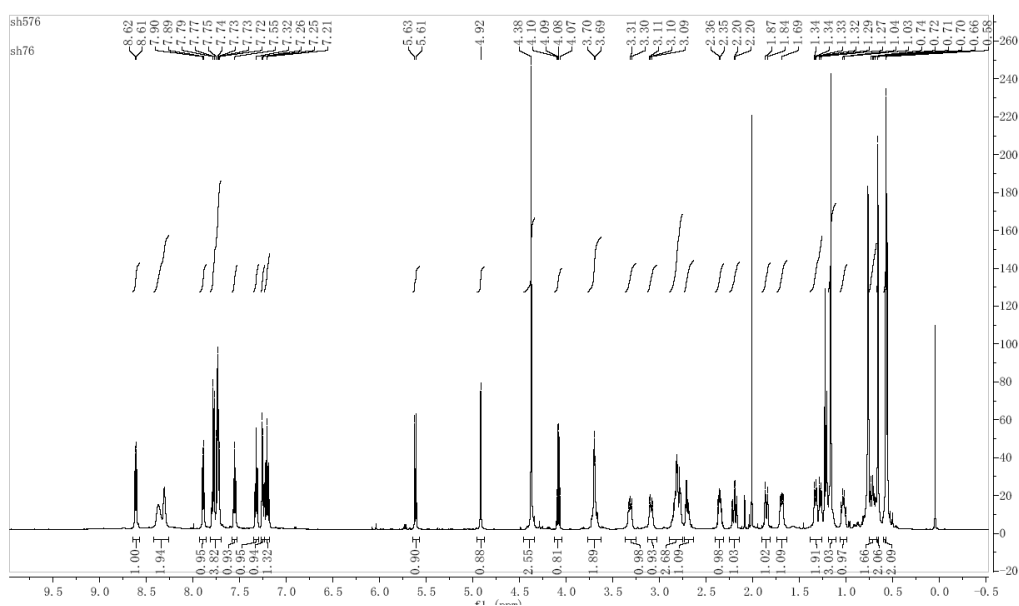

Figure S8.  $^{13}\text{C}$ -NMR spectra of 7c.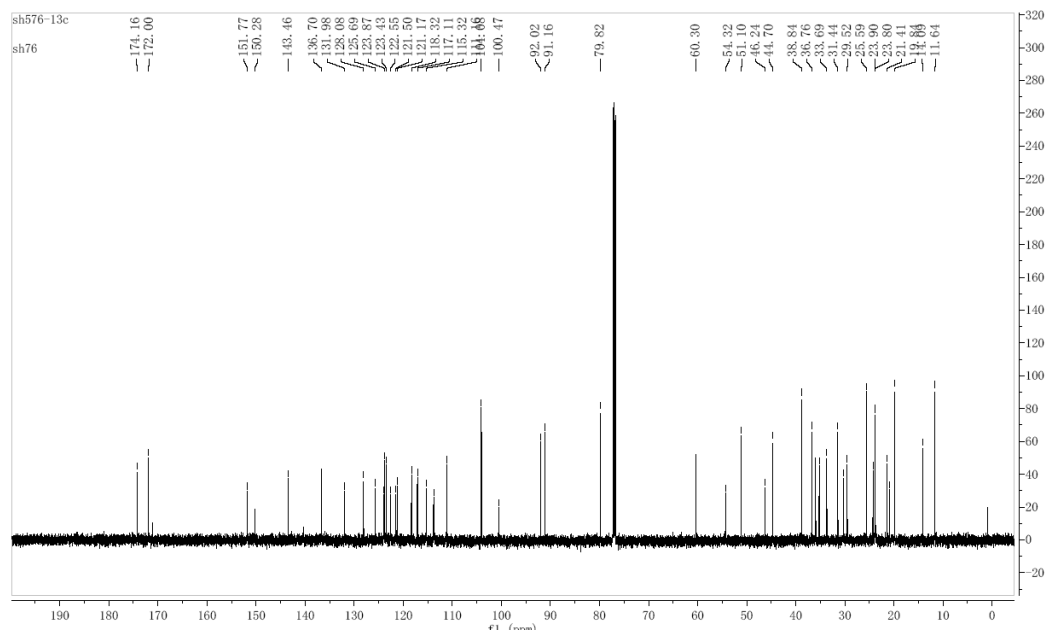

Figure S9. HRMS of 7c.

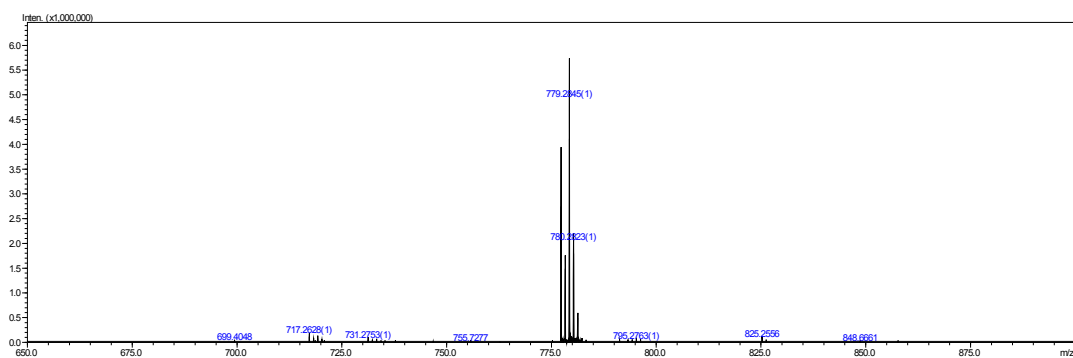Figure S10.  $^1\text{H}$ -NMR spectra of 7d.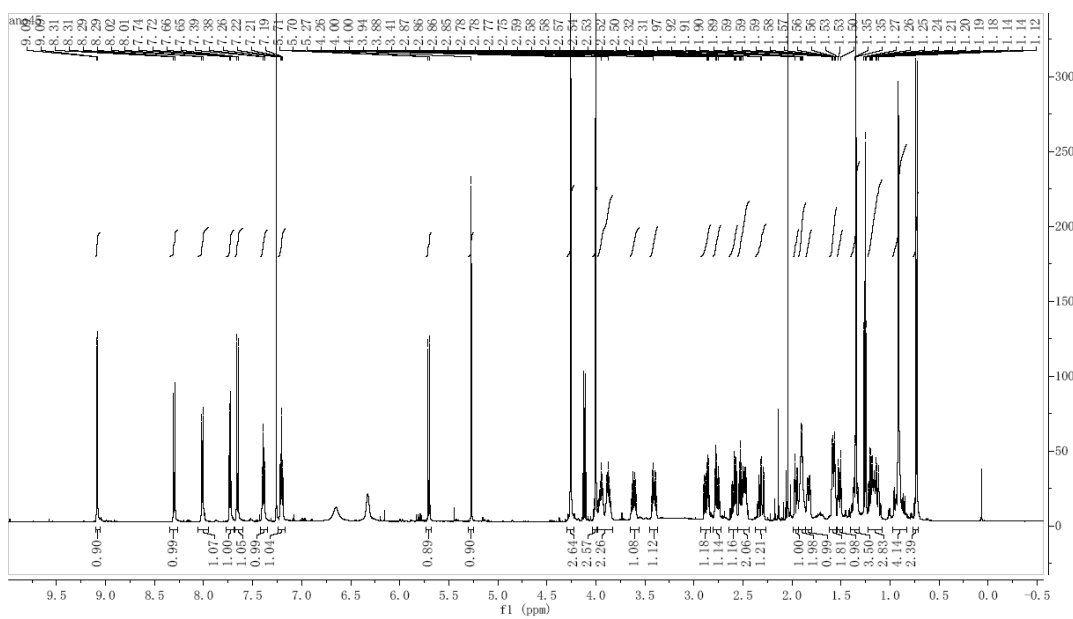

Figure S11.  $^{13}\text{C}$ -NMR spectra of 7d.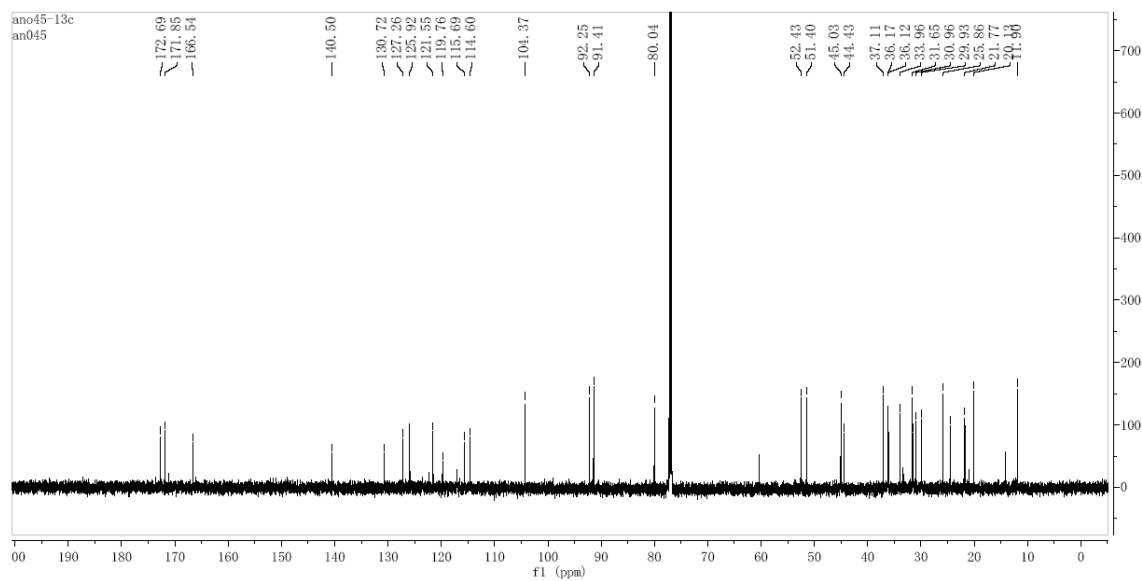

Figure S12. HRMS of 7c.

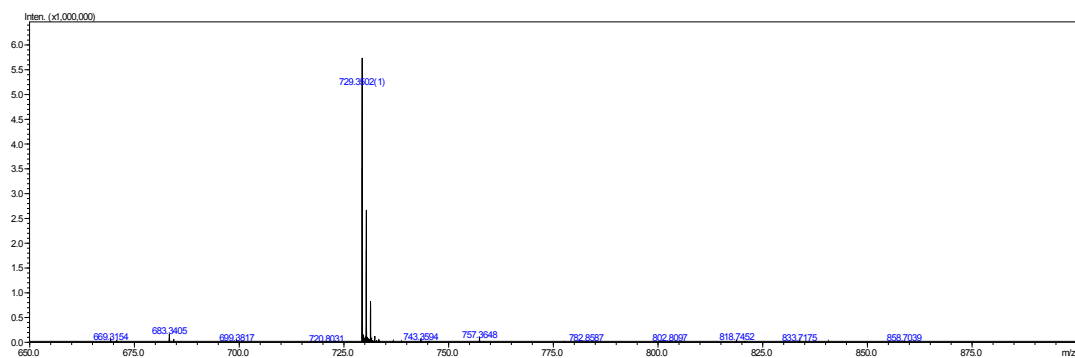Figure S13.  $^1\text{H}$ -NMR spectra of 7e.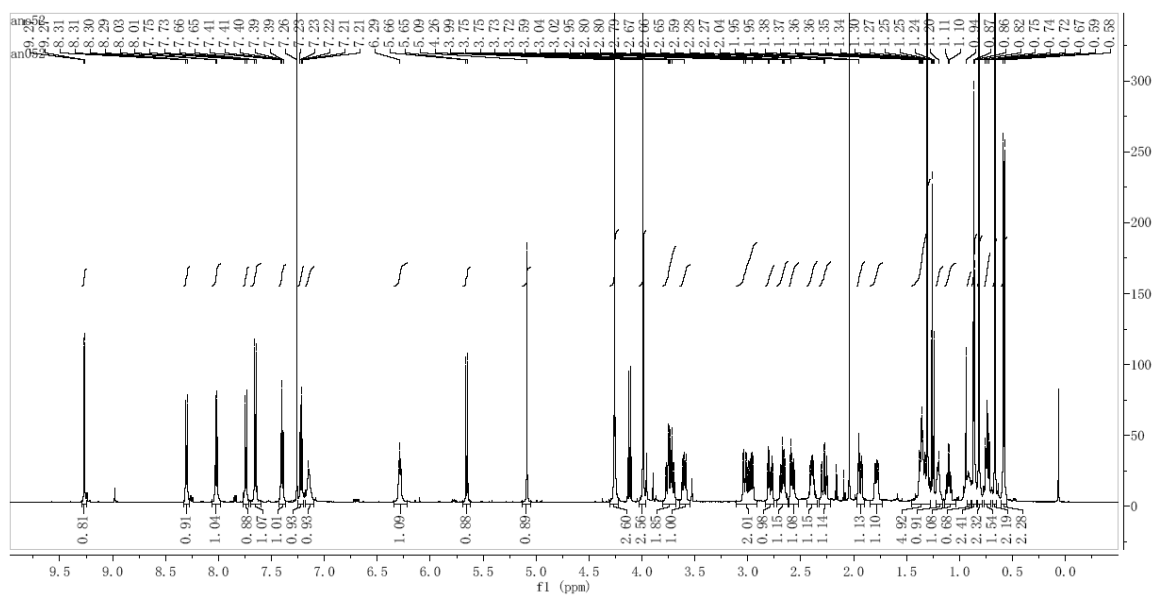

Figure S14.  $^{13}\text{C}$ -NMR spectra of 7e.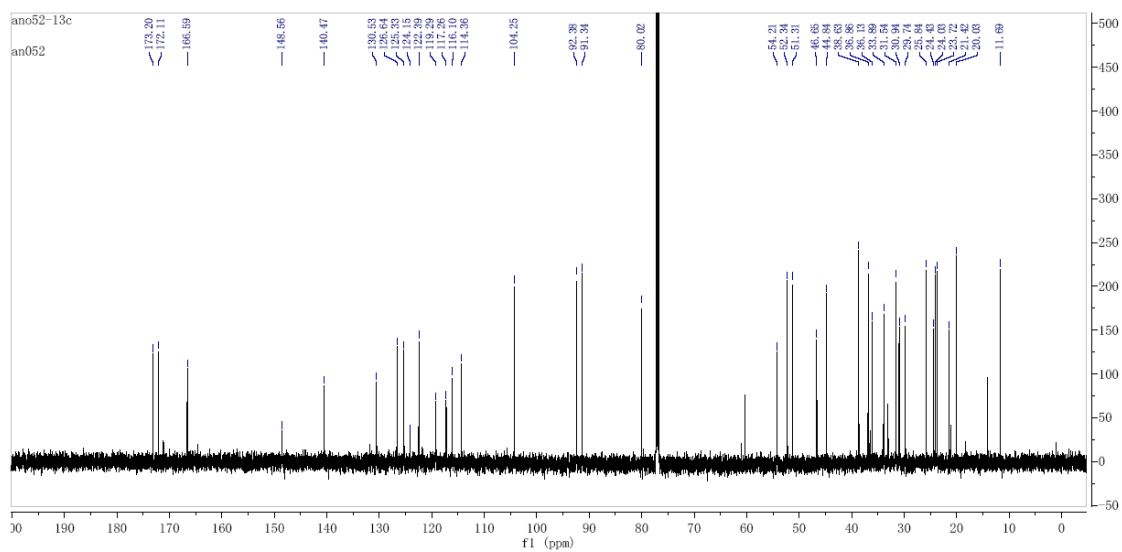

Figure S15. HRMS of 7e.

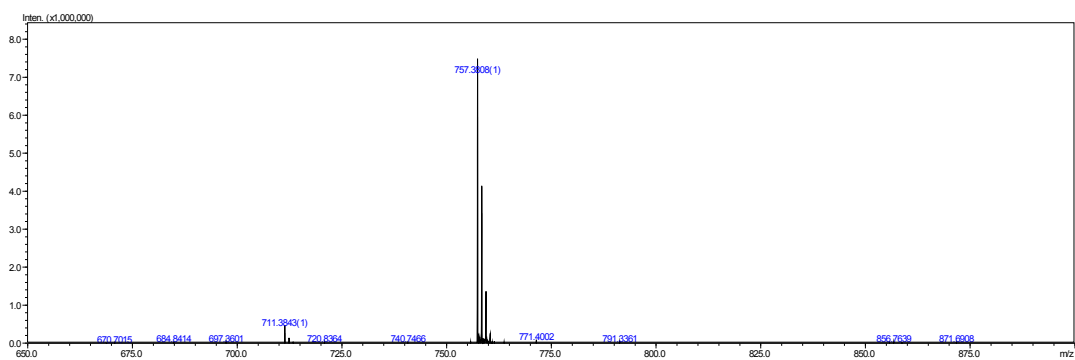Figure S16.  $^1\text{H}$ -NMR spectra of 7f.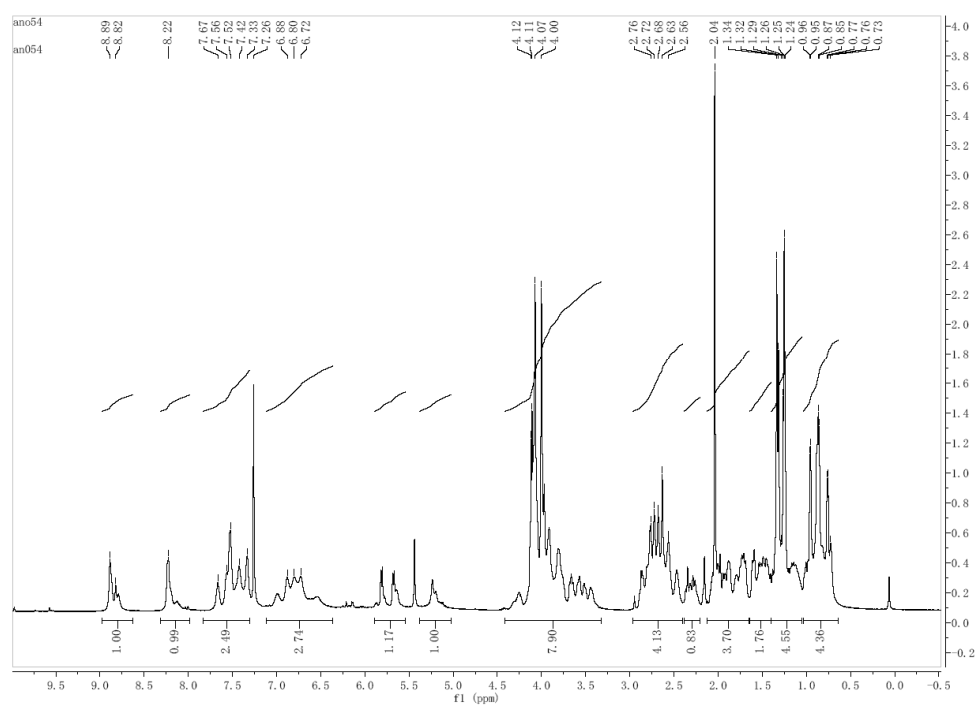

Figure S17.  $^{13}\text{C}$ -NMR spectra of 7f.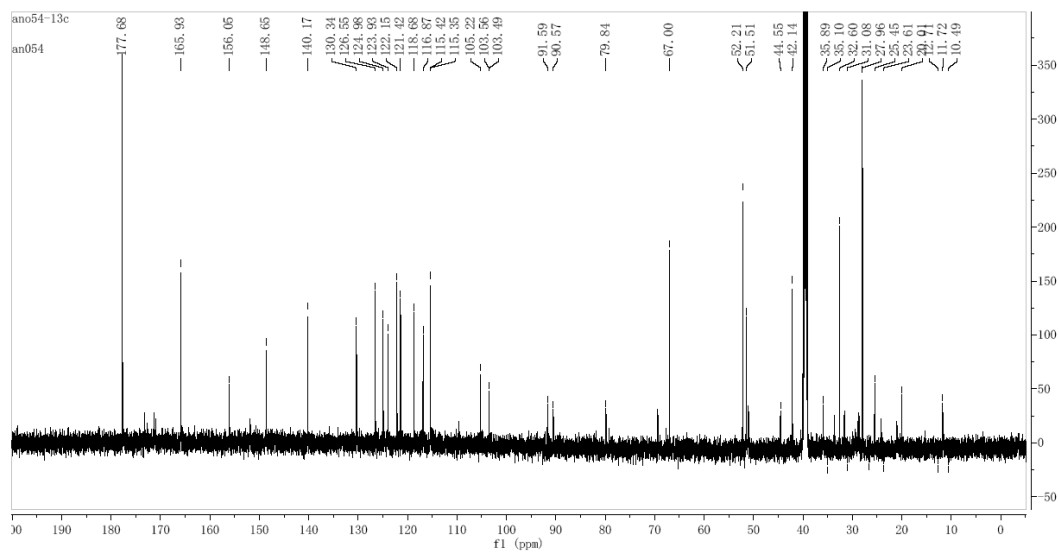

Figure S18. HRMS of 7f.

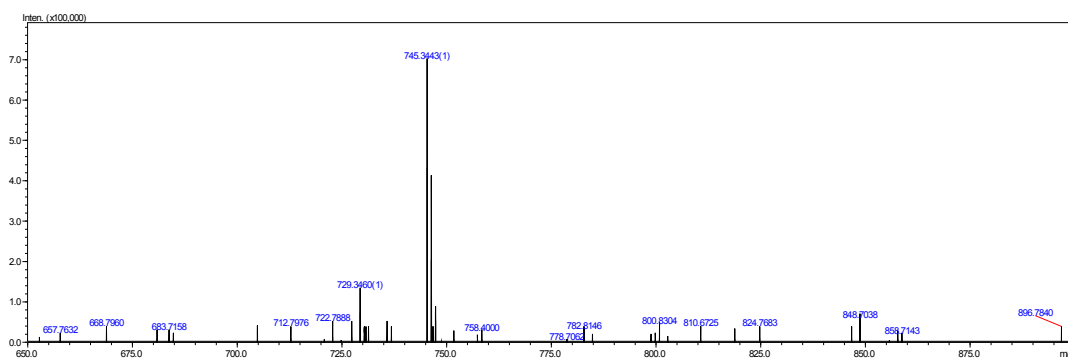Figure S19.  $^1\text{H}$ -NMR spectra of 8.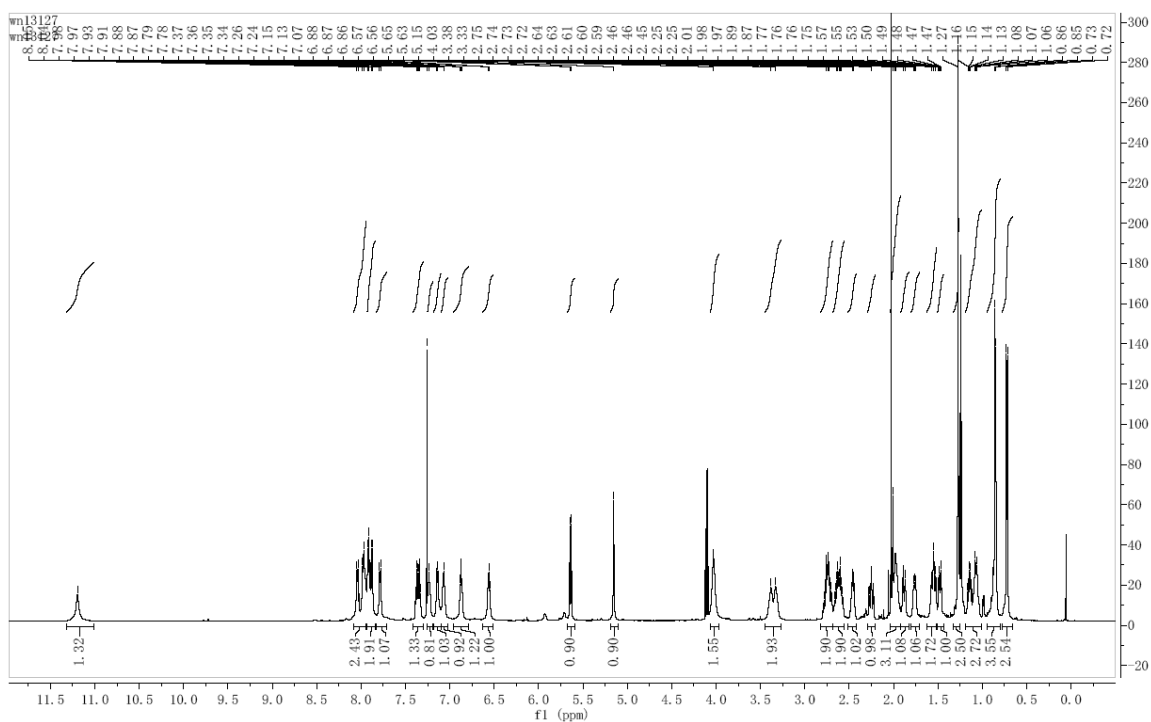

Figure S20.  $^{13}\text{C}$ -NMR spectra of 8.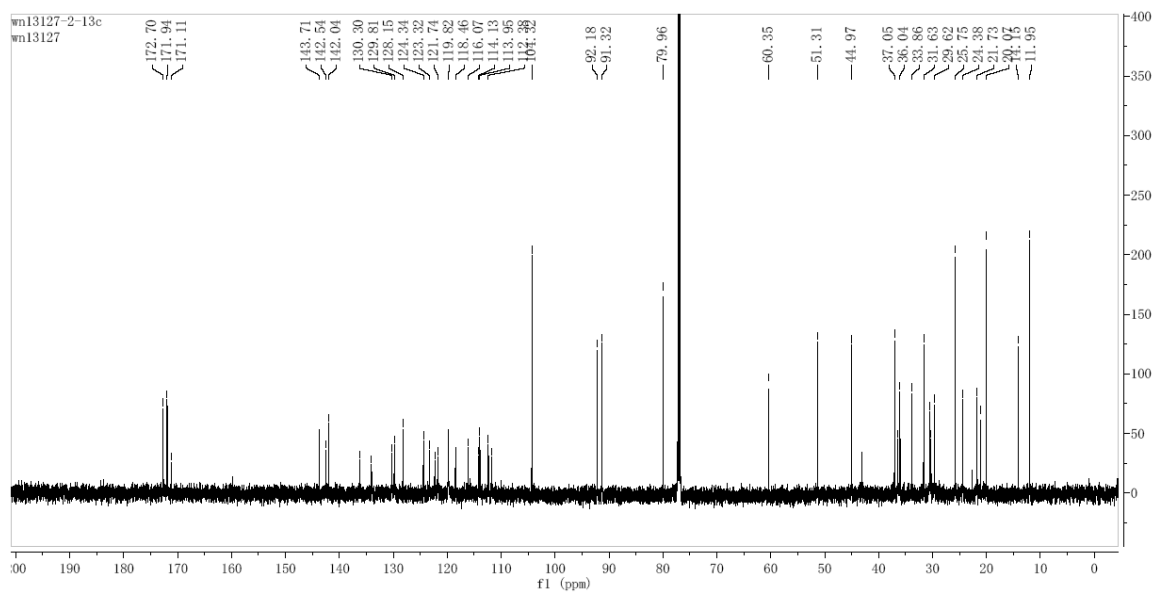

Figure S21. HRMS of 8.

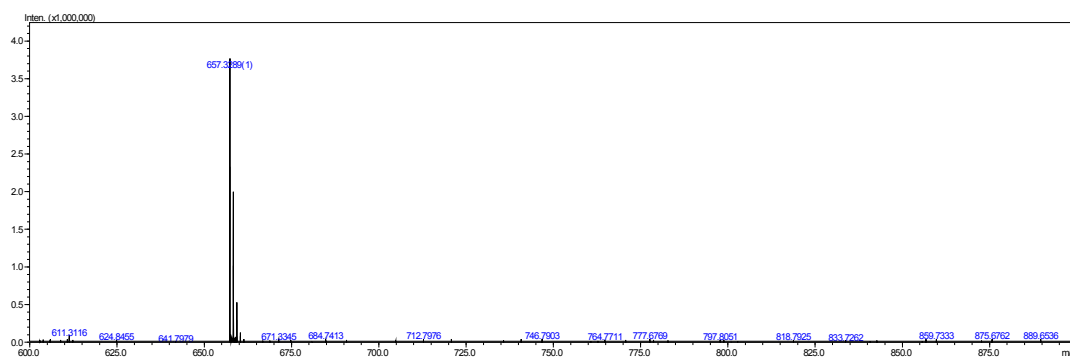Figure S22.  $^1\text{H}$ -NMR spectra of 9.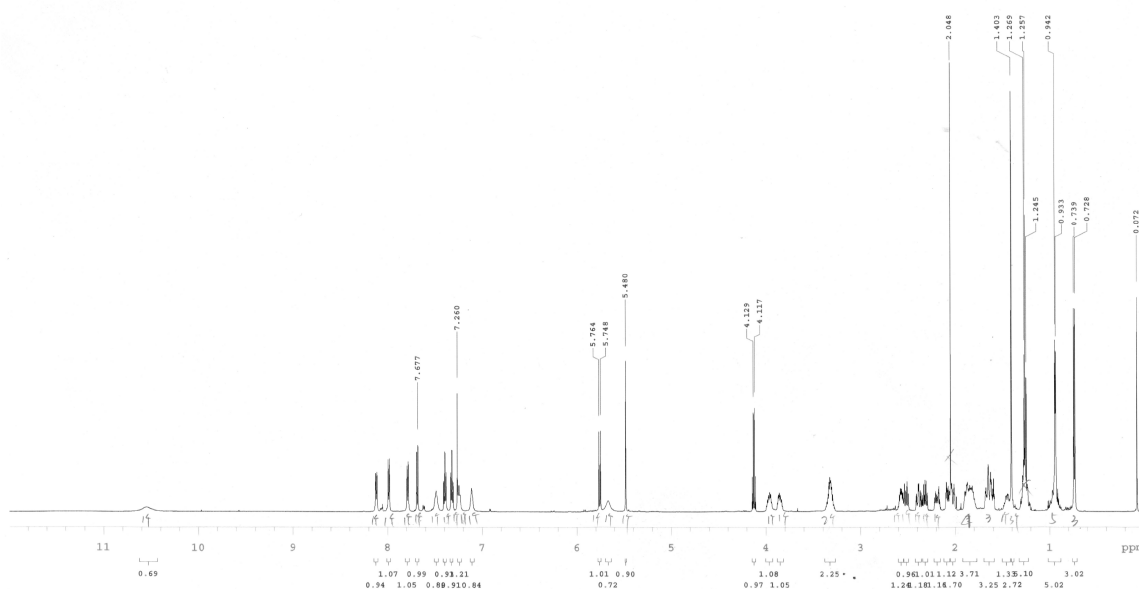



Figure S23.  $^{13}\text{C}$ -NMR spectra of 9.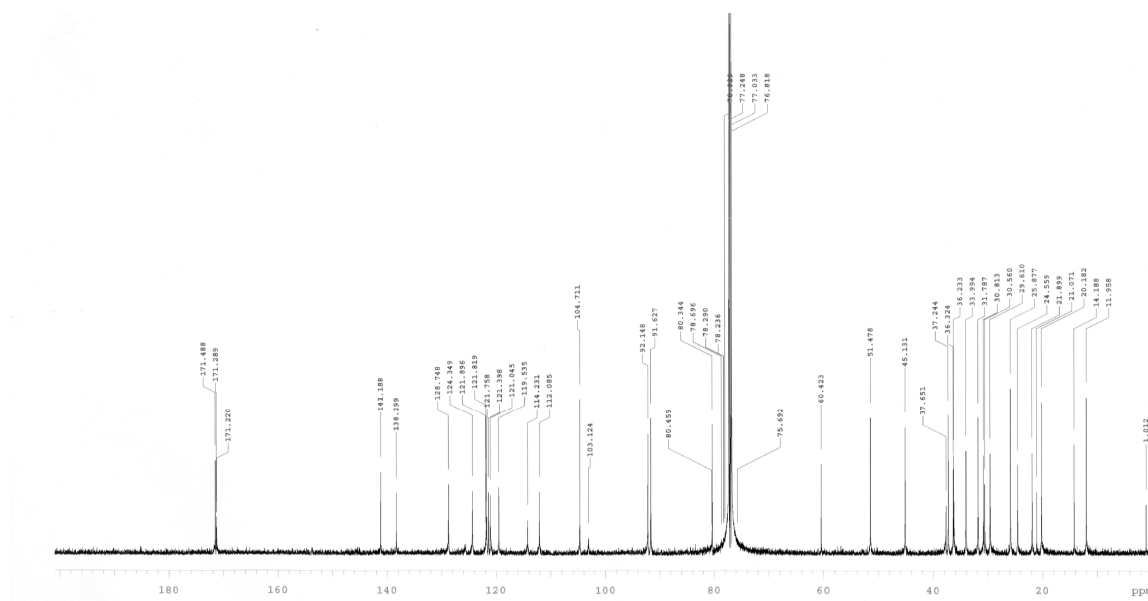

Figure S24. HRMS of 9.

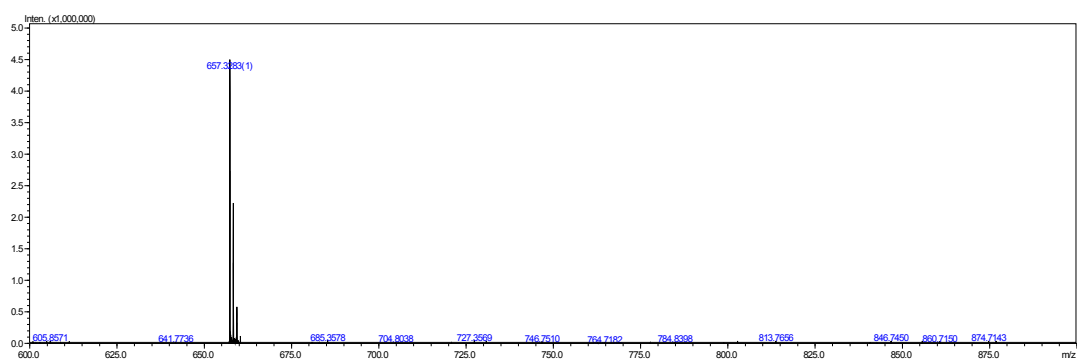

Supplement: molecules-19-19021-s001.pdf [file molecules-19-19021-s001.pdf]
